# Supplementary material
Source: PubMed Central journal article supplement (PMC2585020)
Supplement: 90218.2008_3.pdf [file 90218.2008_3.pdf]

Table S3

DNA sequences of single strand oxytocin and vasopressin oligonucleotides used for the construction of standard curves

| Name       | Sequence (5'-3')*                                                                                                  | length |
|------------|--------------------------------------------------------------------------------------------------------------------|--------|
| OT exon1   | CCT <b>GCCCCAGTCTCGCTTGCT</b> GCCTGCTTGGCCTACTGGCTCTGA<br>CCTCCGCCTGCTACACGGCAAGAG <b>GGGCTGCGCTAGACCTGG</b> AATAT | 90     |
| OT intron1 | GT <b>CCCGTTCTGGCAAGGCTAAG</b> GACCAGAGATGCTCTCCACCTT<br>CAGAGAGCATCCGCCCCACC <b>ACAGTCCCGATATGGATTGTGCACA</b>     | 90     |
| OT intron2 | GGG <b>TGAGCAGGAGGGGGCCTAGC</b> AGGACCGACCGGCAGGGAGCCG<br>TCGGGTTTGCTGCTCAG <b>GCCACTGACCCATTTCTCTTGC</b> AGATGG   | 90     |
| VP exon1   | GAT <b>GCTCAACACTACGCTCTCTGCTTGCTT</b> CCTGAGCCTGCTGGC<br>CCTCACGAGGCAAGAGGGCC <b>ACATCCGACATGGAGCTGAGACAGT</b>    | 90     |
| VP intron1 | GG <b>CCATCTGAATGTCGGAGAGGTAAG</b> TCTCTGAGAGACTGCTGC<br>ACACTGATAACCTAGCCG <b>GTTAGATTTCCACTCTCGCCCTTTACG</b>     | 90     |
| VP intron2 | TGG <b>AGGGTGAGTAGTATGAAGGGGGT</b> CGAGAGTTGGAACGCTATA<br>GGTGCGCCCACCCAGGACGCCT <b>GACCTCACACAGCCCTTCCTTC</b>     | 90     |

\*Primer sequences for the real-time PCR are shown in Bold-type (see Table S2)
